# Supplementary material for: Understanding the perspectives of recruiters is key to improving randomised controlled trial enrolment: a qualitative evidence synthesis
Source: PubMed Central journal article supplement (PMC9585862; doi:10.1186/s13063-022-06818-4), 2022-10-20
Supplement: 13063_2022_6818_MOESM4_ESM.pdf [file 13063_2022_6818_MOESM4_ESM.pdf]

Understanding the perspectives of recruiters is key to improving randomised controlled trial enrolment: a qualitative evidence synthesis – Additional File 4

|                                  | Assessor   | Was there a clear statement of the aims of the research? | Is a qualitative methodology appropriate? | Was the research design appropriate to address the aims of the research? | Was the recruitment strategy appropriate to the aims of the research? | Was the data collected in a way that addressed the research issue? | Has the relationship between researcher and participants been adequately considered? | Have ethical issues been taken into consideration? | Was the data analysis sufficiently rigorous? | Is there a clear statement of findings? | How valuable is the research? (Is the research valuable) | Overall assessment        |
|----------------------------------|------------|----------------------------------------------------------|-------------------------------------------|--------------------------------------------------------------------------|-----------------------------------------------------------------------|--------------------------------------------------------------------|--------------------------------------------------------------------------------------|----------------------------------------------------|----------------------------------------------|-----------------------------------------|----------------------------------------------------------|---------------------------|
| <b>Campbell, M., et al</b>       | NF         | Yes                                                      | Yes                                       | Yes                                                                      | Yes                                                                   | Yes                                                                | Yes                                                                                  | Yes                                                | Yes                                          | Yes                                     | Yes                                                      | No or very minor concerns |
|                                  | Reviewer 2 | Yes                                                      | Yes                                       | Yes                                                                      | Yes                                                                   | Yes                                                                | Yes                                                                                  | Yes                                                | Yes                                          | Yes                                     | Yes                                                      |                           |
| <b>Clement, C., et al</b>        | NF         | Yes                                                      | Yes                                       | Yes?                                                                     | Yes?                                                                  | Yes                                                                | Unclear                                                                              | Yes                                                | Yes                                          | Yes                                     | Yes                                                      | No or very minor concerns |
|                                  | Reviewer 2 | Yes                                                      | Yes                                       | Yes                                                                      | Yes                                                                   | Yes                                                                | Yes?                                                                                 | Yes                                                | Yes?                                         | Yes                                     | Yes                                                      |                           |
| <b>Donovan, J., et al</b>        | NF         | Yes                                                      | Yes                                       | Yes                                                                      | Yes                                                                   | Yes                                                                | Unclear                                                                              | Yes                                                | Yes                                          | Yes                                     | Yes                                                      | No or very minor concerns |
|                                  | Reviewer 2 | Yes                                                      | Yes                                       | Yes                                                                      | Yes                                                                   | Yes                                                                | Unclear                                                                              | Yes                                                | Yes                                          | Yes                                     | Yes                                                      |                           |
| <b>Donovan, J., et al</b>        | NF         | Yes                                                      | Yes                                       | Yes                                                                      | Yes                                                                   | Yes                                                                | No                                                                                   | Unclear                                            | Yes                                          | Yes                                     | Yes                                                      | No or very minor concerns |
|                                  | Reviewer 2 | Yes                                                      | Yes                                       | Yes                                                                      | Yes                                                                   | Yes                                                                | No                                                                                   | Yes                                                | Yes                                          | Yes                                     | Yes                                                      |                           |
| <b>Ekambare shwar, M., et al</b> | NF         | Yes                                                      | Yes                                       | Yes?                                                                     | Unclear                                                               | Yes?                                                               | No                                                                                   | Yes                                                | Yes?                                         | Yes                                     | Yes                                                      | Minor concerns            |
|                                  | Reviewer 2 | Yes                                                      | Yes                                       | Yes?                                                                     | Unclear                                                               | Yes?                                                               | No                                                                                   | Yes                                                | Yes?                                         | Yes                                     | Yes                                                      |                           |
| <b>Frayne, S., et al</b>         | NF         | Yes                                                      | Yes                                       | Yes                                                                      | Yes                                                                   | Yes                                                                | No                                                                                   | Yes                                                | Yes?                                         | Yes                                     | Yes                                                      | Minor concerns            |
|                                  | Reviewer 2 | Yes                                                      | Yes                                       | Yes                                                                      | Yes                                                                   | Yes                                                                | No                                                                                   | Yes                                                | Yes?                                         | Yes                                     | Yes                                                      |                           |
| <b>Griffin, D., et al</b>        | NF         | Yes                                                      | Yes                                       | Yes                                                                      | Yes                                                                   | Yes                                                                | Unclear                                                                              | Yes?                                               | Yes                                          | Yes                                     | Yes                                                      | No or very minor concerns |
|                                  | Reviewer 2 | Yes                                                      | Yes                                       | Yes                                                                      | Yes                                                                   | Yes                                                                | Unclear                                                                              | yes?                                               | Yes                                          | Yes                                     | Yes                                                      |                           |

Understanding the perspectives of recruiters is key to improving randomised controlled trial enrolment: a qualitative evidence synthesis – Additional File 4

|                             |            |     |     |     |      |      |         |         |      |     |     |                           |
|-----------------------------|------------|-----|-----|-----|------|------|---------|---------|------|-----|-----|---------------------------|
| <b>Hallowell, N., et al</b> | NF         | Yes | Yes | Yes | Yes  | Yes  | No      | Yes     | Yes  | Yes | Yes | No or very minor concerns |
|                             | Reviewer 2 | Yes | Yes | Yes | Yes  | Yes  | No      | Yes     | Yes  | Yes | Yes |                           |
| <b>Hamdy, F., et al</b>     | NF         | Yes | Yes | Yes | Yes  | Yes  | Unclear | Yes     | Yes  | Yes | Yes | No or very minor concerns |
|                             | Reviewer 2 | Yes | Yes | Yes | Yes  | Yes  | No      | Yes     | Yes  | Yes | Yes |                           |
| <b>Hamilton, D., et al</b>  | NF         | Yes | Yes | Yes | Yes? | Yes  | No      | Yes     | Yes? | Yes | Yes | No or very minor concerns |
|                             | Reviewer 2 | Yes | Yes | Yes | Yes? | Yes  | No      | Yes     | Yes? | Yes | Yes |                           |
| <b>Hamlet, C., et al</b>    | NF         | Yes | Yes | Yes | Yes? | Yes  | Yes?    | Unclear | Yes? | Yes | Yes | No or very minor concerns |
|                             | Reviewer 2 | Yes | Yes | Yes | Yes  | Yes  | Yes     | Yes     | Yes  | Yes | yes |                           |
| <b>Hange, D., et al</b>     | NF         | Yes | Yes | Yes | Yes  | Yes  | Yes     | Yes     | Yes? | Yes | Yes | Minor concerns            |
|                             | Reviewer 2 | Yes | Yes | Yes | Yes  | Yes  | Yes     | Yes     | Yes  | Yes | Yes |                           |
| <b>Hanson, L., et al</b>    | NF         | Yes | Yes | Yes | Yes  | Yes  | Unclear | Yes     | Yes? | Yes | Yes | No or very minor concerns |
|                             | Reviewer 2 | Yes | Yes | Yes | Yes  | Yes  | Unclear | Yes     | Yes? | Yes | Yes |                           |
| <b>Holm, M., et al</b>      | NF         | Yes | Yes | Yes | Yes  | Yes  | Unclear | Yes     | Yes  | Yes | Yes | No or very minor concerns |
|                             | Reviewer 2 | Yes | Yes | Yes | Yes  | Yes  | Yes     | Yes     | Yes  | Yes | Yes |                           |
| <b>Howard, L., et al</b>    | NF         | Yes | Yes | Yes | Yes? | Yes? | No      | No      | Yes? | Yes | Yes | Minor concerns            |
|                             | Reviewer 2 | Yes | Yes | Yes | Yes? | Yes? | No      | No      | Yes? | Yes | Yes |                           |
| <b>Langley, C., et al</b>   | NF         | Yes | Yes | Yes | Yes  | Yes  | No      | Unclear | Yes  | Yes | Yes | No or very minor concerns |
|                             | Reviewer 2 | Yes | Yes | Yes | Yes  | Yes  | No      | Unclear | Yes  | Yes | Yes |                           |



Understanding the perspectives of recruiters is key to improving randomised controlled trial enrolment: a qualitative evidence synthesis – Additional File 4

|                            |            |     |     |     |      |      |         |         |         |     |     |     |                           |
|----------------------------|------------|-----|-----|-----|------|------|---------|---------|---------|-----|-----|-----|---------------------------|
| <b>Strong, S., et al</b>   | NF         | Yes | Yes | Yes | Yes  | Yes  | Yes     | Yes     | Yes     | Yes | Yes | Yes | No or very minor concerns |
|                            | Reviewer 2 | Yes | Yes | Yes | Yes  | Yes  | Yes     | Yes     | Yes     | Yes | Yes | Yes |                           |
| <b>Team, V., et al</b>     | NF         | Yes | Yes | Yes | Yes? | Yes  | No      | Yes     | Yes     | Yes | Yes | Yes | No or very minor concerns |
|                            | Reviewer 2 | Yes | Yes | Yes | Yes? | Yes  | No      | Yes     | Yes     | Yes | Yes | Yes |                           |
| <b>Tomlin, Z., et al</b>   | NF         | Yes | Yes | Yes | Yes? | Yes  | Yes     | Yes     | Yes     | Yes | Yes | Yes | No or very minor concerns |
|                            | Reviewer 2 | Yes | Yes | Yes | Yes? | Yes  | Yes     | Yes     | Yes     | Yes | Yes | Yes |                           |
| <b>Wright, J., et al</b>   | NF         | Yes | Yes | Yes | Yes  | Yes  | Unclear | Unclear | Unclear | Yes | Yes | Yes | Minor concerns            |
|                            | Reviewer 2 | Yes | Yes | Yes | Yes  | Yes  | Unclear | Unclear | Unclear | Yes | Yes | Yes |                           |
| <b>Ziebland, S., et al</b> | NF         | Yes | Yes | Yes | Yes  | Yes? | Yes?    | Yes     | Yes     | Yes | Yes | Yes | No or very minor concerns |
|                            | Reviewer 2 | Yes | Yes | Yes | Yes  | Yes? | Yes?    | Yes     | Yes     | Yes | Yes | Yes |                           |
