# Supplementary material for: Understanding the perspectives of recruiters is key to improving randomised controlled trial enrolment: a qualitative evidence synthesis
Source: Trials. 2022 Oct 20;23:883. doi: 10.1186/s13063-022-06818-4 (PMC9585862; doi:10.1186/s13063-022-06818-4)
Supplement: Supplementary file 7 — Additional file 7. Study Characteristics. Characteristics of each of the studies included in the synthesis. [file 13063_2022_6818_MOESM7_ESM.pdf]

Understanding the perspectives of recruiters is key to improving randomised controlled trial enrolment: a qualitative evidence synthesis – Additional File 7

| Study author            | Year | Title                                                                                                                     | Country | Aim                                                                                                                                                                                                                                                                                                                                                                                                                                                        | Healthcare setting           | Number of RCT(s) and clinical context                                                                                            | Data collection method | Recruiters                                                                                                                                      | Timing of qualitative research |
|-------------------------|------|---------------------------------------------------------------------------------------------------------------------------|---------|------------------------------------------------------------------------------------------------------------------------------------------------------------------------------------------------------------------------------------------------------------------------------------------------------------------------------------------------------------------------------------------------------------------------------------------------------------|------------------------------|----------------------------------------------------------------------------------------------------------------------------------|------------------------|-------------------------------------------------------------------------------------------------------------------------------------------------|--------------------------------|
| Campbell, M., et al (1) | 2007 | Recruitment to randomised trials: strategies for trial enrolment and participation study. The STEPS study                 | UK      | Interviewees with a range of roles (e.g. nurse, GP) within an RCT were interviewed with the intention of exploring “the unique circumstances potentially relevant to recruitment for each trial. This element of the research aims to understand, through the opinions of the interviewees, how recruitment may be affected in a very broad sense, and so focuses on their progress, any challenges that arose and any adaptations that were made.” [p.20] | Mix of primary and secondary | 4 :<br>FOCUS (Cancer)<br>TOuCAN (Adolescent psychiatry)<br>HPS (Cardiovascular, health promotion)<br>ELEVATE (Asthma management) | Interviews             | <b>16</b><br>1 Principal Investigator (PI)<br>2 Central recruiters<br>2 Local lead investigators<br>2 Recruiting doctors<br>9 Recruiting nurses | Post RCT recruitment period    |
| Clement, C., et al (2)  | 2019 | Challenges to and Facilitators of Recruitment to an Alzheimer’s Disease Clinical Trial: A Qualitative Interview Study     | UK      | A qualitative study was undertaken during recruitment to the RADAR RCT which “aimed to identify potential challenges to, and facilitators of, recruitment to the RADAR RCT and to draw out implications for improving recruitment to Alzheimer’s disease trials more widely” [p.1068]                                                                                                                                                                      | Secondary                    | 1:<br>RADAR (Alzheimer’s disease)                                                                                                | Interviews             | <b>17</b><br>7 Doctors<br>10 Nurses                                                                                                             | During RCT recruitment period  |
| Donovan, J., et al (3)  | 2014 | Clear obstacles and hidden challenges: understanding recruiter perspectives in six pragmatic randomised controlled trials | UK      | “This study aimed i) to understand the recruitment process from the perspective of recruiters actively recruiting RCT participants in six pragmatic RCTs, and ii) to identify opportunities for interventions to improve recruitment.” [p.1]                                                                                                                                                                                                               | Mix of primary and secondary | 6 - not named but described (Cancer x3, primary care and cancer, primary care and infection, mental health and community care)   | Interviews             | <b>86</b><br>32 Doctors, Chief Investigators (CIs) or Trial Management Group (TMG)<br>40 Nurses<br>15 follow up                                 | During RCT recruitment period  |
| Donovan, J., et al (4)  | 2014 | The intellectual challenges and emotional consequences of equipoise contributed to                                        | UK      | “The aim of the study was to investigate how doctors considered and experienced the concept of equipoise while recruiting patients                                                                                                                                                                                                                                                                                                                         | Mix of primary and secondary | 6 - EaStER (Surgery and oncology)<br>FACS (Primary care and oncology)                                                            | Interviews             | <b>47</b><br>21 Surgeons<br>3 GPs                                                                                                               | During RCT recruitment period  |

Understanding the perspectives of recruiters is key to improving randomised controlled trial enrolment: a qualitative evidence synthesis – Additional File 7

|                              |      |                                                                                                                                                   |           |                                                                                                                                                                                                                                                                                                                                                                                                                 |           |                                                                                                                                                 |                                             |                                                                                                                                                                      |                           |
|------------------------------|------|---------------------------------------------------------------------------------------------------------------------------------------------------|-----------|-----------------------------------------------------------------------------------------------------------------------------------------------------------------------------------------------------------------------------------------------------------------------------------------------------------------------------------------------------------------------------------------------------------------|-----------|-------------------------------------------------------------------------------------------------------------------------------------------------|---------------------------------------------|----------------------------------------------------------------------------------------------------------------------------------------------------------------------|---------------------------|
|                              |      | the fragility of recruitment in six randomized controlled trials                                                                                  |           | to randomized controlled trials” [p.912]                                                                                                                                                                                                                                                                                                                                                                        |           | PITCH (Primary care and paediatrics)<br>SWAN (Psychiatry, community services)<br>Protect (Surgery and oncology)<br>SPARE (Oncology and surgery) |                                             | 3 Community mental health<br>5 Oncologists<br>15 Follow up interviews                                                                                                |                           |
| Ekambareshwar, M., et al (5) | 2018 | Facilitators and challenges in recruiting pregnant women to an infant obesity prevention programme delivered via telephone calls or text messages | Australia | “This paper focused on the trial recruitment process of the CHAT RCT, to identify facilitators and challenges in recruiting pregnant women to a low intensity health promotion programme where health behaviour change messages are delivered via telephone calls or text messages.” [p.2]                                                                                                                      | Secondary | 1 - CHAT RCT (Health promotion in pregnancy)                                                                                                    | Interviews                                  | <b>4</b><br>4 Recruiters                                                                                                                                             | During recruitment period |
| Frayne, S., et al (6)        | 2001 | Attitudes of primary care physicians toward cancer-prevention trials: a focus group analysis                                                      | USA       | “We sought to characterize primary care physicians' perceptions of patient-level and physician level barriers to subject recruitment for cancer-prevention trials.” [p.451]                                                                                                                                                                                                                                     | Primary   | 1-BCPT trial (Breast cancer)                                                                                                                    | Focus group                                 | <b>7</b><br>7 Physicians                                                                                                                                             | During recruitment period |
| Griffin, D., et al (7)       | 2016 | UK FASHIoN: feasibility study of a randomised controlled trial of arthroscopic surgery for hip impingement compared with best conservative care   | UK        | Within the context of the UK FASHIoN RCT, qualitative research methods were used to “1) understand the recruitment process so that any difficulties related to design or conduct can be identified and changes put in place. 2) determine any staff training needs and develop a strategy to address these needs.” This work was undertaken with the hope of optimising recruitment to a future full RCT [p.43] | Secondary | 1 - UK FASHIoN (Hip impingement)                                                                                                                | Interviews and audio-recorded consultations | <b>21 + 87</b><br><b>Interviews:</b><br>21 Clinicians and research associates<br><b>Audio-recorded consultations:</b><br>87 diagnostic and recruitment consultations | During recruitment period |
| Hallowell, N., et al (8)     | 2016 | The role of therapeutic optimism in recruitment to a clinical trial in a peripartum setting:                                                      | UK        | “The aim of the qualitative research was to evaluate staffs’ and patients’ experiences of the trial’s recruitment procedures and                                                                                                                                                                                                                                                                                | Secondary | 1 - GOT-IT (Obstetrics)                                                                                                                         | Interviews                                  | <b>27</b><br>10 Obstetricians<br>6 Clinical midwives                                                                                                                 | During recruitment period |

Understanding the perspectives of recruiters is key to improving randomised controlled trial enrolment: a qualitative evidence synthesis – Additional File 7

|                          |      |                                                                                                                                                    |        |                                                                                                                                                                                                                                                     |           |                                                                    |                                                           |                                                                                                                                   |                                          |
|--------------------------|------|----------------------------------------------------------------------------------------------------------------------------------------------------|--------|-----------------------------------------------------------------------------------------------------------------------------------------------------------------------------------------------------------------------------------------------------|-----------|--------------------------------------------------------------------|-----------------------------------------------------------|-----------------------------------------------------------------------------------------------------------------------------------|------------------------------------------|
|                          |      | balancing hope and uncertainty                                                                                                                     |        | consent pathway to see if these aspects of trial delivery could be improved prior to rollout of the main trial...The analysis reported below focuses on staff members' views and experiences of recruiting to the trial" [p.3-4]                    |           |                                                                    |                                                           | 11 Research midwives                                                                                                              |                                          |
| Hamdy, F., et al (9)     | 2018 | Partial ablation versus radical prostatectomy in intermediate-risk prostate cancer: the PART feasibility RCT                                       | UK     | The qualitative research for the PART feasibility RCT "was embedded into the feasibility study with the aim of understanding the recruitment process and to identify clear obstacles and hidden challenges to recruitment." [p.7]                   | Secondary | 1 – PART (Prostate cancer)                                         | Interviews and audio-recorded consultations               | <b>12+64 Interviews:</b><br>11 Recruiting clinicians<br>1 Research Nurse<br><b>Audio-recorded consultations:</b><br>64            | During recruitment period                |
| Hamilton, D., et al (10) | 2013 | The recruitment of patients to trials in head and neck cancer: a qualitative study of the EaStER trial of treatments for early laryngeal cancer    | UK     | "We aimed to investigate the factors contributing to poor recruitment to the EaStER trial." [p.2333]                                                                                                                                                | Secondary | 1 – EaStER (Early laryngeal cancer)                                | Audio-recorded consultations, interviews and focus groups | <b>6</b><br>3 Surgeons<br>3 Recruiters<br>(NB. Number of interviews, focus groups and audio-recordings not reported individually) | Unclear/during recruitment period        |
| Hamlet, C., et al (11)   | 2017 | Recruiting young people with a visible difference to the YP Face IT feasibility trial: a qualitative exploration of primary care staff experiences | UK     | "This study aimed to explore GP and nurses' experiences of recruiting to a trial exploring the feasibility of evaluating YP Face IT, a novel online psychosocial intervention to support young people with appearance-altering conditions." [p.541] | Primary   | 1 - YPF feasibility trial (Online support for visible differences) | Interviews and focus groups                               | <b>14</b><br>11 GPs<br>3 Nurses                                                                                                   | Both during and after recruitment period |
| Hange, D., et al (12)    | 2015 | Experiences of staff members participating in primary care research activities: a qualitative study                                                | Sweden | "The aim of this paper was to study primary care staff members' experiences and perceptions of participating in a randomized controlled trial concerning Internet therapy." [p.143]                                                                 | Primary   | 1-PRIM-NET (Primary Health Care-Internet)                          | Interviews and focus groups                               | <b>34</b><br>15 Nurses<br>3 Practice managers<br>3 Study nurses<br>13 GPs                                                         | Unclear/during recruitment period        |

Understanding the perspectives of recruiters is key to improving randomised controlled trial enrolment: a qualitative evidence synthesis – Additional File 7

|                         |      |                                                                                                                                                                 |        |                                                                                                                                                                                                              |                         |                                                                                                   |                             |                                                                                                                                                                    |                                          |
|-------------------------|------|-----------------------------------------------------------------------------------------------------------------------------------------------------------------|--------|--------------------------------------------------------------------------------------------------------------------------------------------------------------------------------------------------------------|-------------------------|---------------------------------------------------------------------------------------------------|-----------------------------|--------------------------------------------------------------------------------------------------------------------------------------------------------------------|------------------------------------------|
| Hanson, L., et al (13)  | 2014 | Strategies to support recruitment of patient with life-limiting illness for research: the Palliative Care Research Cooperative (PCRC) Group                     | USA    | The objective of this study was “to describe barriers and strategies for recruitment during the inaugural PCRC clinical trial.” [p.1021]                                                                     | Palliative              | 1 - not named but described (Statin use in palliative population)                                 | Interviews                  | <b>18</b><br>PIs and Clinical Research Coordinators (CRCs)                                                                                                         | As recruitment period ended              |
| Holm, M., et al (14)    | 2017 | Recruiting participants to a randomized controlled trial testing an intervention in palliative cancer care – the perspectives of health care professionals      | Sweden | “The aim of this study is to describe how healthcare professionals experienced recruiting participants to an RCT testing an intervention for family caregivers in specialized palliative cancer care.” [p.7] | Palliative              | 1 - not named but described (A psycho-educational group intervention trial for family caregivers) | Interviews and focus groups | <b>25</b><br>16 Nurses<br>4 Physicians<br>5 Social workers                                                                                                         | Both during and after recruitment period |
| Howard, L., et al (15)  | 2009 | Why is recruitment to trials difficult? An investigation into recruitment difficulties in an RCT of supported employment in patients with severe mental illness | UK     | This study aimed “to evaluate reasons for under-recruitment in an RCT of patients with severe mental illness.” [p.40]                                                                                        | Community/mental health | 1 – SWAN (Severe mental illness)                                                                  | Interviews and workshops    | <b>6 + 17</b><br><b>Interviews:</b><br>1 CI<br>1 PI<br>1 Trial coordinator<br>1 Research nurse<br>2 Care coordinators<br><b>Workshops:</b><br>17 Care coordinators | During/end of recruitment period         |
| Langley, C., et al (16) | 2000 | Clinicians' attitudes to recruitment to randomised trials in cancer care: a qualitative study                                                                   | UK     | “This study aimed to examine attitudes to, and difficulties with recruitment to, randomised trials in cancer care by using a combination of a mailed questionnaire and qualitative interviews.” [p.164]      | Secondary               | Not reported                                                                                      | Interviews                  | <b>20</b><br>20 Hospital clinicians                                                                                                                                | Unclear – likely to be retrospective     |
| Mason, V., et al (17)   | 2007 | GPs' experiences of primary care mental health research: a qualitative study of the barriers to recruitment                                                     | UK     | “The aim of this study was to investigate the views of GPs towards recruiting patients presenting with depression into RCTs during primary care consultations, in order to identify                          | Primary                 | 1 – GenPod (Depression)                                                                           | Interview                   | <b>41</b><br>41 GPs                                                                                                                                                | Unclear/during recruitment period        |

Understanding the perspectives of recruiters is key to improving randomised controlled trial enrolment: a qualitative evidence synthesis – Additional File 7

|                             |      |                                                                                                                                                                          |    |                                                                                                                                                                                                                                                                                                                                                                     |           |                                                               |                                             |                                                                                                                                     |                                      |
|-----------------------------|------|--------------------------------------------------------------------------------------------------------------------------------------------------------------------------|----|---------------------------------------------------------------------------------------------------------------------------------------------------------------------------------------------------------------------------------------------------------------------------------------------------------------------------------------------------------------------|-----------|---------------------------------------------------------------|---------------------------------------------|-------------------------------------------------------------------------------------------------------------------------------------|--------------------------------------|
|                             |      |                                                                                                                                                                          |    | the particular barriers to recruiting this patient group.” [p.519]                                                                                                                                                                                                                                                                                                  |           |                                                               |                                             |                                                                                                                                     |                                      |
| Paleri, V., et al (18)      | 2018 | Gastrostomy versus nasogastric tube feeding for chemoradiation patients with head and neck cancer: the TUBE pilot RCT                                                    | UK | “The aims of this qualitative sub-study of the TUBE trial were to identify, describe and understand (1) barriers to, and facilitators of, trial recruitment; (2) issues of trial conduct; and (3) experiences of feeding tubes.” [p.44]                                                                                                                             | Secondary | 1 – TUBE (Head and neck cancer)                               | Interviews and audio-recorded consultations | <b>19 + 4 Interviews:</b><br>6 Doctors<br>5 Research nurses<br>5 Dietitians<br>3 SALTs<br><b>Audio-recorded consultations:</b><br>4 | Unclear/during recruitment period    |
| Paramasivan, S., et al (19) | 2011 | Key issues in recruitment to randomised controlled trials with very different interventions: a qualitative investigation of recruitment to the SPARE trial (CRUK/07/011) | UK | The qualitative research in the SPARE (Selective bladder Preservation Against Radical Excision) feasibility study was undertaken “to explore reasons for low recruitment and attempt to improve recruitment rates by implementing changes suggested by qualitative findings.” [p.1]                                                                                 | Secondary | 1 -SPARE (Bladder cancer)                                     | Interviews and audio-recorded consultations | <b>9 + 4 Interviews:</b><br>9 Recruiters<br><b>Audio-recorded consultations:</b><br>4                                               | During recruitment period            |
| Phelps, E., et al (20)      | 2019 | Facilitating trial recruitment: A qualitative study of patient and staff experiences of an orthopaedic trauma trial                                                      | UK | “This study aimed to understand patients’ and staffs’ experiences of an orthopaedic trauma trial.” [p.1]<br>“All staff were asked about their experience of i) recruiting to TrAFFix and other trauma trials, ii) their experience of explaining research studies to patients and iii) their views on their colleagues’ engagement with research and TrAFFix” [p.3] | Secondary | 1- TrAFFix (Orthopaedics)                                     | Interviews                                  | <b>24</b><br>10 Surgeons<br>14 research associates                                                                                  | Towards end of study                 |
| Potter, R., et al (21)      | 2009 | A qualitative study exploring practice nurses’ experience of participating in a primary care-based randomised controlled trial                                           | UK | “The aim of this study is to explore the views of practice nurses’ recruiting into a primary care-based randomised controlled trial, and to investigate factors that influence the success of trial recruitment.” [p.439]                                                                                                                                           | Primary   | 1 - not named but described (Telephone support for diabetics) | Interviews                                  | <b>10</b><br>10 Practice nurses                                                                                                     | Shortly after the recruitment period |

Understanding the perspectives of recruiters is key to improving randomised controlled trial enrolment: a qualitative evidence synthesis – Additional File 7

|                         |      |                                                                                                                                                       |           |                                                                                                                                                                                                                                                 |                                                 |                                                                                     |                                             |                                                                                                                                                             |                           |
|-------------------------|------|-------------------------------------------------------------------------------------------------------------------------------------------------------|-----------|-------------------------------------------------------------------------------------------------------------------------------------------------------------------------------------------------------------------------------------------------|-------------------------------------------------|-------------------------------------------------------------------------------------|---------------------------------------------|-------------------------------------------------------------------------------------------------------------------------------------------------------------|---------------------------|
| Shaheed, C., et al (22) | 2014 | Participation of pharmacists in clinical trial recruitment for low back pain                                                                          | Australia | "This study aimed to explore the experiences of pharmacists recruiting patients to a low back pain (LBP) clinical trial conducted in Australia, the challenges they experienced and screening and management of people with acute LBP." [p.986] | Pharmacy                                        | 1 – PACE (Lower back pain)                                                          | Open ended questionnaire                    | <b>30</b><br>15 Successful pharmacist recruiters<br>15 Unsuccessful pharmacist recruiters                                                                   | Unclear                   |
| Sin, J., et al (23)     | 2016 | What factors influence successful recruitment of siblings of individuals with first episode psychosis to e- health interventions? A qualitative study | UK        | "This study investigated the challenges experienced and strategies employed in the recruitment of siblings of people with first episode psychosis using Early Intervention in Psychosis Services (EIPS) in England." [p.696]                    | Early Intervention in Psychosis Services (EIPS) | 1 - E Sibling Project Randomised Control Trial (E-health intervention for siblings) | Interviews                                  | <b>12</b><br>4 PIs<br>4 Research assistants (clinical studies officer/clinical studies assistant)<br>4 Clinicians                                           | During recruitment period |
| Skea, Z., et al (24)    | 2017 | 'It's trying to manage the work': a qualitative evaluation of recruitment processes within a UK multicentre trial                                     | UK        | The aim of the qualitative research integrated into the TISU RCT was "to identify trial-specific modifiable factors that could enhance the facilitators and remove the barriers to recruitment." [p.2]                                          | Secondary                                       | 1 – TISU (Ureteric stones)                                                          | Interviews                                  | <b>11</b><br>1 Grant co-applicant<br>3 PIs<br>1 Consultant urologist<br>4 Research nurses<br>1 Research assistant                                           | RCT ongoing               |
| Stein, R., et al (25)   | 2016 | OPTIMA prelim: a randomised feasibility study of personalised care in the treatment of women with early breast cancer                                 | UK        | The integrated recruitment study in OPTIMA prelim "aimed to work with the chief investigator (CI), TMG and OPTIMA staff to identify and address barriers to recruitment, in three phases." [p.24]                                               | Secondary                                       | 1 - OPTIMA Prelim (Breast cancer)                                                   | Interviews and audio-recorded consultations | <b>13 + 36</b><br><b>Interviews:</b><br>8 Oncologists<br>4 Research nurses<br>1 Surgeon<br><b>Audio-recorded consultations:</b><br>36 oncology appointments | During recruitment period |
| Strong, S., et al (26)  | 2016 | 'The trial is owned by the team, not by an individual': a qualitative                                                                                 | UK        | "The aim of this study was to explore how teamwork influences recruitment to a multicentre                                                                                                                                                      | Secondary                                       | 1 - not named but described                                                         | Interviews                                  | <b>21</b><br>8 Surgeons<br>5 Oncologists                                                                                                                    | During recruitment period |

Understanding the perspectives of recruiters is key to improving randomised controlled trial enrolment: a qualitative evidence synthesis – Additional File 7

|                        |      |                                                                                                                                               |        |                                                                                                                                                                                                                                                                                                                                                   |                        |                                                                         |                                                                        |                                                                                                                                 |                                                          |
|------------------------|------|-----------------------------------------------------------------------------------------------------------------------------------------------|--------|---------------------------------------------------------------------------------------------------------------------------------------------------------------------------------------------------------------------------------------------------------------------------------------------------------------------------------------------------|------------------------|-------------------------------------------------------------------------|------------------------------------------------------------------------|---------------------------------------------------------------------------------------------------------------------------------|----------------------------------------------------------|
|                        |      | study exploring the role of teamwork in recruitment to randomised controlled trials in surgical oncology                                      |        | randomised controlled trial (RCT) involving interventions delivered by different clinical specialties." [p.1]                                                                                                                                                                                                                                     |                        | (Oesophageal cancer)                                                    |                                                                        | 5 Research nurses<br>1 Specialist nurse<br>1 Research fellow<br>1 Trial coordinator                                             |                                                          |
| Team, V., et al (27)   | 2018 | Barriers and facilitators to participant recruitment to randomised controlled trials: A qualitative perspective                               | UK     | "The aim of this qualitative project was to identify barriers and facilitators to participant recruitment for a randomised double-blinded placebo-controlled trial on the clinical effectiveness of aspirin as an adjunct to compression therapy in healing chronic venous leg ulcers." [p.929]                                                   | Primary                | 1 – ASPIVLU (Venous leg ulcers)                                         | Interviews                                                             | <b>22</b><br>4 Wound clinic consultants<br>3 GPs<br>9 Wound clinic nurses<br>4 Research nurses<br>2 Research officers           | Unclear/during recruitment period                        |
| Tomlin, Z., et al (28) | 2012 | Patient advocacy and patient centredness in participant recruitment to randomized-controlled trials: implications for informed consent        | UK     | "This article reports from a study of trial recruitment." [p.672] The objective of the research was "to explore the views and experiences of nurses recruiting patients to randomized-controlled trials and to examine the extent to which their recruitment practices were patient-centred and patient empowering." [p.670]                      | Secondary              | 5 – described but not named (Cancer x3, childhood fever, mental health) | Interviews, audio-recorded consultations and group discussion sessions | <b>9+32+23</b><br><b>Interviews:</b> 9 Nurses<br><b>Group sessions:</b> 30-32 Nurses<br><b>Audio-recorded consultations:</b> 23 | Following the last audio-recording (during recruitment?) |
| Wright, J., et al (29) | 2002 | Factors that Influence the Recruitment of Patients to Phase III Studies in Oncology: The Perspective of the Clinical Research Associate (CRA) | Canada | "The current study was initiated to provide a broader understanding of the factors that may influence patients' decisions regarding entry into randomized, Phase III clinical trials. This understanding was sought by exploring the factors that influence recruitment from the perspective of the CRA and specifically to discuss the impact of | Regional cancer centre | Phase 3 studies                                                         | Focus groups                                                           | <b>13</b><br>10 Nurses<br>3 Data managers                                                                                       | Unclear/after recruitment experience                     |

Understanding the perspectives of recruiters is key to improving randomised controlled trial enrolment: a qualitative evidence synthesis – Additional File 7

|                          |      |                                                                                                                                                                                                  |    |                                                                                                                                                                                                                                                                                     |           |                                                     |           |                       |                         |
|--------------------------|------|--------------------------------------------------------------------------------------------------------------------------------------------------------------------------------------------------|----|-------------------------------------------------------------------------------------------------------------------------------------------------------------------------------------------------------------------------------------------------------------------------------------|-----------|-----------------------------------------------------|-----------|-----------------------|-------------------------|
|                          |      |                                                                                                                                                                                                  |    | the CRA on the success of patient recruitment." [p.1585]                                                                                                                                                                                                                            |           |                                                     |           |                       |                         |
| Ziebland, S., et al (30) | 2007 | Does it matter if clinicians recruiting for a trial don't understand what the trial is really about? Qualitative study of surgeons' experiences of participation in a pragmatic multi-centre RCT | UK | "We used in-depth interviews with surgeons who participated in the Spine Stabilisation Trial (a pragmatic RCT) to explore their understanding of the trial purpose and how this understanding had influenced their recruitment procedures and interpretation of the results." [p.1] | Secondary | 1-Spine Stabilisation Trial (Chronic low back pain) | Interview | <b>11</b><br>Surgeons | Post recruitment period |

1. Campbell MK, Snowdon C, Francis D, Elbourne D, McDonald AM, Knight R, et al. Recruitment to randomised trials: strategies for trial enrolment and participation study. The STEPS study. *Health Technol Assess*. 2007;11(48):113.
2. Clement C, Selman LE, Kehoe PG, Howden B, Lane JA, Horwood J. Challenges to and facilitators of recruitment to an Alzheimer's disease clinical trial: A qualitative interview study. *Journal of Alzheimer's Disease*. 2019;69(4):1067-75. Understanding the perspectives of recruiters is key to improving randomised controlled trial enrolment: a qualitative evidence synthesis – Additional File 7
3. Donovan JL, Paramasivan S, de Salis I, Toerien M. Clear obstacles and hidden challenges: understanding recruiter perspectives in six pragmatic randomised controlled trials. *Trials*. 2014;15.
4. Donovan JL, de Salis I, Toerien M, Paramasivan S, Hamdy FC, Blazeby JM. The intellectual challenges and emotional consequences of equipoise contributed to the fragility of recruitment in six randomized controlled trials. *J Clin Epidemiol*. 2014;67(8):912-20.
5. Ekambareshwar M, Mihrshahi S, Wen LM, Taki S, Bennett G, Baur LA, et al. Facilitators and challenges in recruiting pregnant women to an infant obesity prevention programme delivered via telephone calls or text messages. *Trials*. 2018;19:9.
6. Frayne SM, Mancuso M, Prout MN, Freund KM. Attitudes of primary care physicians toward cancer-prevention trials: A focus group analysis. *Journal of the National Medical Association*. 2001;93(11):450-7.
7. Griffin D, Wall P, Realpe A, Adams A, Parsons N, Hobson R, et al. UK FASHIoN: feasibility study of a randomised controlled trial of arthroscopic surgery for hip impingement compared with best conservative care. *Health technology assessment (Winchester, England)*. 2016;20(32):1-172.
8. Hallowell N, Snowdon C, Morrow S, Norman JE, Denison FC, Lawton J. The role of therapeutic optimism in recruitment to a clinical trial in a peripartum setting: balancing hope and uncertainty. *Trials*. 2016;17:13.
9. Hamdy FC, Elliott D, Le Conte S, Davies LC, Burns RM, Thomson C, et al. Partial ablation versus radical prostatectomy in intermediate-risk prostate cancer: The PART feasibility RCT. *Health Technol Assess*. 2018;22(52):1-95.
10. Hamilton DW, De Salis I, Donovan JL, Birchall M. The recruitment of patients to trials in head and neck cancer: A qualitative study of the EaStER trial of treatments for early laryngeal cancer. *European Archives of Oto-Rhino-Laryngology*. 2013;270(8):2333-7.
11. Hamlet C, Williamson H, Harcourt D. Recruiting young people with a visible difference to the YP Face IT feasibility trial: A qualitative exploration of primary care staff experiences. *Primary Health Care Research and Development*. 2017;18(6):541-8.
12. Hange D, Bjorkelund C, Svenningsson I, Kivi M, Eriksson MC, Petersson EL. Experiences of staff members participating in primary care research activities: A qualitative study. *International Journal of General Medicine*. 2015;8:143-8.
13. Hanson LC, Bull J, Wessell K, Massie L, Bennett RE, Kutner JS, et al. Strategies to Support Recruitment of Patients With Life-Limiting Illness for Research: The Palliative Care Research Cooperative Group. *J Pain Symptom Manage*. 2014;48(6):1021-30.
14. Holm M, Alvariza A, Fürst C-J, Wengström Y, Årestedt K, Öhlen J, et al. Recruiting participants to a randomized controlled trial testing an intervention in palliative cancer care – The perspectives of health care professionals. *European Journal of Oncology Nursing*. 2017;31:6-11.
15. Howard L, de Salis I, Tomlin Z, Thornicroft G, Donovan J. Why is recruitment to trials difficult? An investigation into recruitment difficulties in an RCT of supported employment in patients with severe mental illness. *Contemp Clin Trials*. 2009;30(1):40-6.
16. Langley C, Gray S, Selley S, Bowie C, Price C. Clinicians' attitudes to recruitment to randomised trials in cancer care: a qualitative study. *Journal of health services research & policy*. 2000;5(3):164-9.
17. Mason VL, Shaw A, Wiles NJ, Mulligan J, Peters TJ, Sharp D, et al. GPs' experiences of primary care mental health research: a qualitative study of the barriers to recruitment. *Fam Pract*. 2007;24(5):518-25.
18. Paleri V, Patterson J, Rousseau N, Moloney E, Craig D, Tzelis D, et al. Gastrostomy versus nasogastric tube feeding for chemoradiation patients with head and neck cancer: The tube pilot RCT. *Health Technol Assess*. 2018;22(16).
19. Paramasivan S, Huddart R, Hall E, Lewis R, Birtle A, Donovan JL. Key issues in recruitment to randomised controlled trials with very different interventions: a qualitative investigation of recruitment to the SPARE trial (CRUK/07/011). *Trials*. 2011;12:15.
20. Phelps EE, Tutton E, Griffin X, Baird J, Costa ML, Parsons N, et al. Facilitating trial recruitment: A qualitative study of patient and staff experiences of an orthopaedic trauma trial. *Trials*. 2019;20(1):492.
21. Potter R, Dale J, Caramlau I. A qualitative study exploring practice nurses' experience of participating in a primary care-based randomised controlled trial. *Journal of Research in Nursing*. 2009;14(5):439-47.
22. Shaheed CA, Maher CG, Williams KA, McLachlan AJ. Participation of pharmacists in clinical trial recruitment for low back pain. *International Journal of Clinical Pharmacy*. 2014;36(5):986-94.
